# Supplementary material for: MPLasso: Inferring microbial association networks using prior microbial knowledge
Source: PubMed Central journal article supplement (PMC5760079; doi:10.1371/journal.pcbi.1005915), 2017-12-27

**(a)**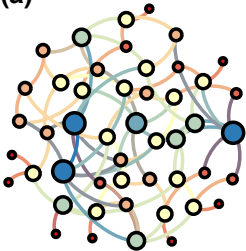**(b)**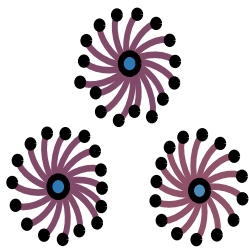**(c)**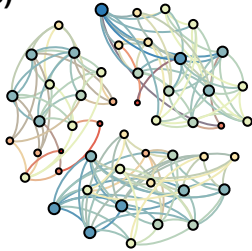**(d)**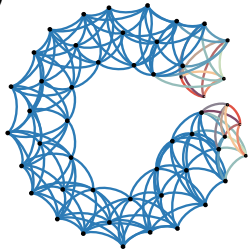**(e)**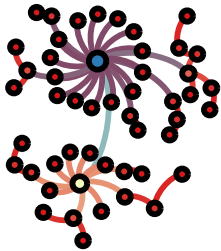

Supplement: pcbi.1005915.s001.pdf [file pcbi.1005915.s001.pdf]
