# Supplementary material for: MPLasso: Inferring microbial association networks using prior microbial knowledge
Source: PubMed Central journal article supplement (PMC5760079; doi:10.1371/journal.pcbi.1005915), 2017-12-27

AUPR

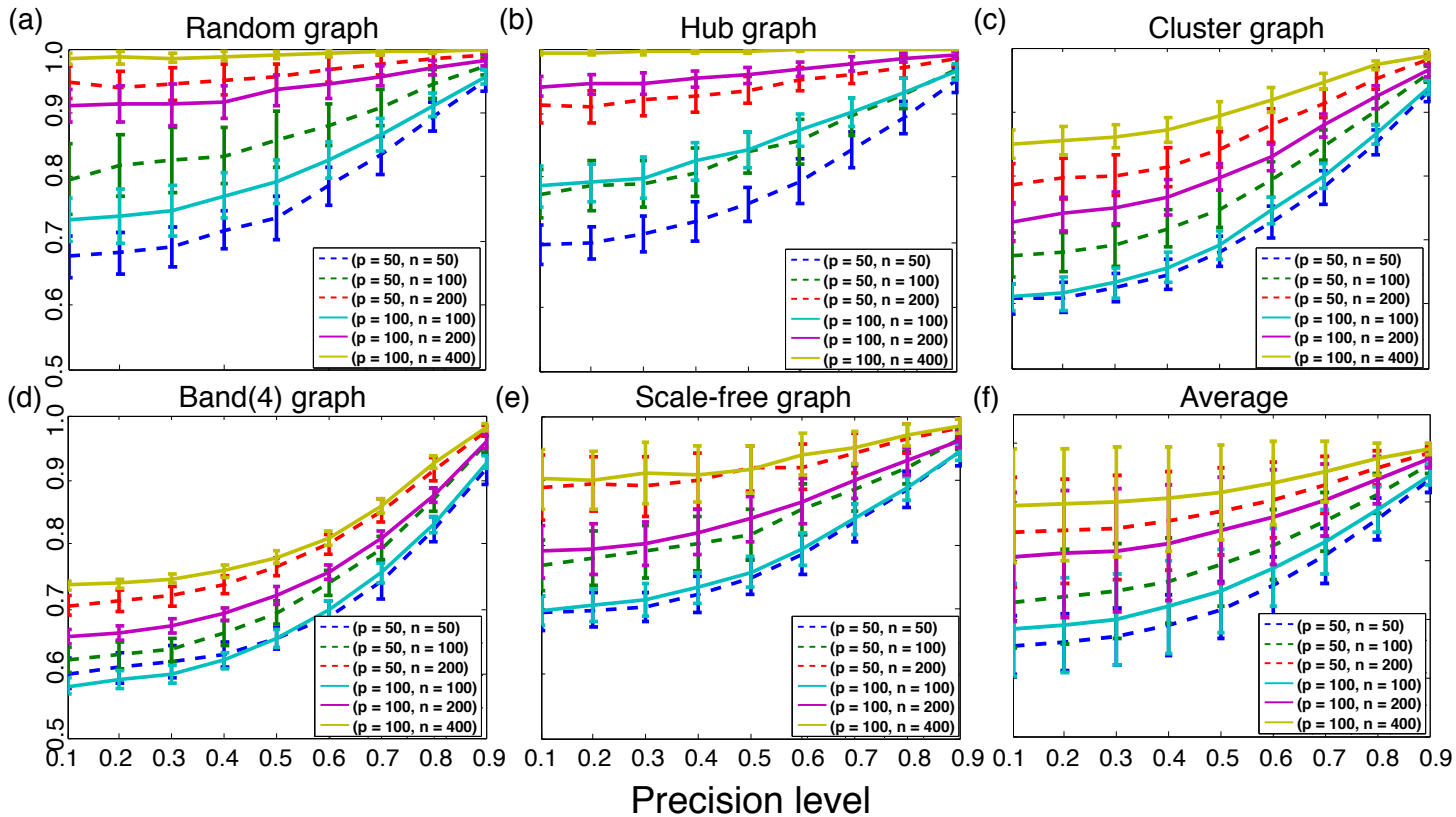

Supplement: pcbi.1005915.s002.pdf [file pcbi.1005915.s002.pdf]
