# Supplementary material for: MPLasso: Inferring microbial association networks using prior microbial knowledge
Source: PubMed Central journal article supplement (PMC5760079; doi:10.1371/journal.pcbi.1005915), 2017-12-27

(a) AntNar, HMASM

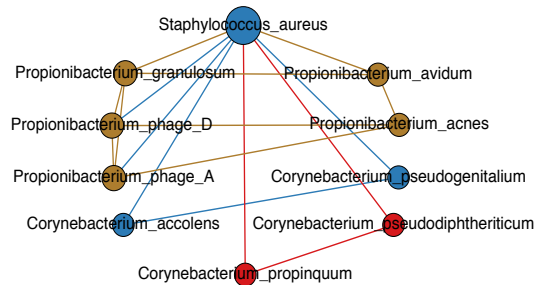

(b) AntNar, HMMCP

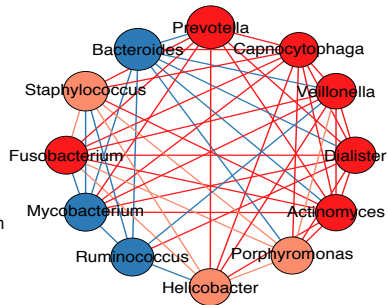

(c) AntNar, HMQCP

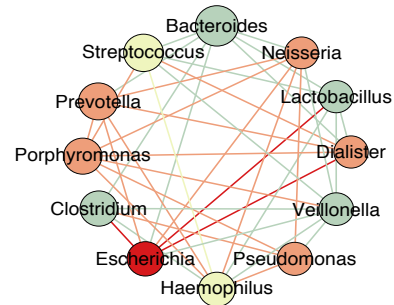

(d) Stool, HMASM

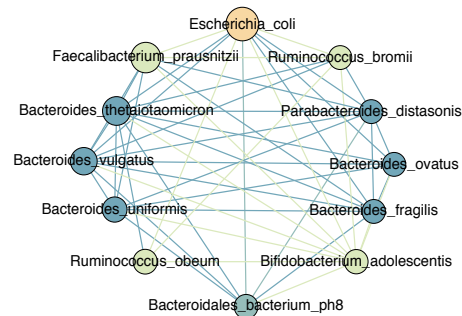

(e) Stool, HMMCP

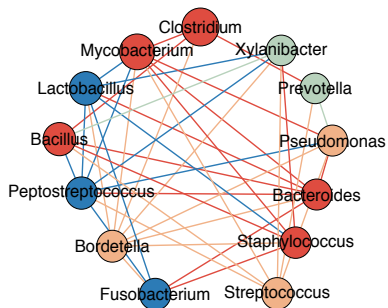

(f) Stool, HMQCP

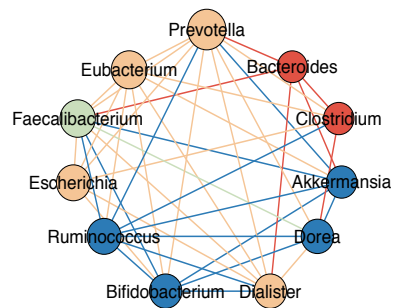

Supplement: pcbi.1005915.s008.pdf [file pcbi.1005915.s008.pdf]
