# Supplementary material for: MPLasso: Inferring microbial association networks using prior microbial knowledge
Source: PubMed Central journal article supplement (PMC5760079; doi:10.1371/journal.pcbi.1005915), 2017-12-27
Supplement: pcbi.1005915.s010.pdf [file pcbi.1005915.s010.pdf]

(a)

# of associated pairs  
found by MPLasso using  
**full** number of samples ( $A$ )

# of associated pairs  
found by MPLasso using  
**half** number of samples ( $p$ )

Recovery rate of associated pairs ( $r$ ):  $p/A$

(b)

# of text-mined associations ( $T$ )

# of text-mined pairs  
recovered by MPLasso using  
**half** number of samples ( $t$ )

Recovery rate of text-mined pairs ( $s$ ):  $t/T$
