# Supplementary material for: MPLasso: Inferring microbial association networks using prior microbial knowledge
Source: PubMed Central journal article supplement (PMC5760079; doi:10.1371/journal.pcbi.1005915), 2017-12-27
Supplement: pcbi.1005915.s011.pdf [file pcbi.1005915.s011.pdf]

**S1 Table. A comparison of correlation based methods adopted from [1].**

| Methods        | Measures                                        | Assumption                                                      | Run-time [secs] |
|----------------|-------------------------------------------------|-----------------------------------------------------------------|-----------------|
| CCREPE         | Pearson/Spearman correlation                    | None                                                            | 38.284          |
| CCLasso        | Pearson correlation of log-ratio transform data | Edge density is no greater than $(\frac{1}{2} - \frac{1}{p-1})$ | 9.220           |
| SparCC         | Pearson correlation of log-ratio transform data | Average correlation of a taxon and others is zero               | 2.984           |
| REBACCA        | Pearson correlation of log-ratio transform data | Each taxon interacts with less than quarter of total taxa       | 124.840         |
| SPIEC(gl)      | Partial correlation of log-ratio transform data | Number of interactions scales linearly with the number of taxa  | 24.884          |
| SPIEC(mb)      | Partial correlation of log-ratio transform data | Number of interactions scales linearly with the number of taxa  | 20.820          |
| <b>MPLasso</b> | Partial correlation of log-ratio transform data | Number of interactions scales linearly with the number of taxa  | <b>1.098</b>    |

[1] Li C, et al. Predicting microbial interactions through computational approaches. Elsevier Methods. 2016;102:12?9.  
doi:10.1016/j.ymeth.2016.02.019.
