# Supplementary material for: MPLasso: Inferring microbial association networks using prior microbial knowledge
Source: PubMed Central journal article supplement (PMC5760079; doi:10.1371/journal.pcbi.1005915), 2017-12-27
Supplement: pcbi.1005915.s012.pdf [file pcbi.1005915.s012.pdf]

**S2 Table. Performance comparison of different methods for additive log normal model.**

| Method       | $L_1$                | ACC                  | AUPR                 | $L_1$                | ACC                  | AUPR                 | $L_1$                | ACC                  | AUPR                 |
|--------------|----------------------|----------------------|----------------------|----------------------|----------------------|----------------------|----------------------|----------------------|----------------------|
| Random Graph |                      |                      |                      |                      |                      |                      |                      |                      |                      |
| MPLasso      | <b>0.069 (0.008)</b> | <b>0.956 (0.007)</b> | <b>0.735 (0.034)</b> | 0.063 (0.008)        | <b>0.972 (0.007)</b> | <b>0.859 (0.044)</b> | <b>0.037 (0.004)</b> | <b>0.982 (0.003)</b> | <b>0.793 (0.034)</b> |
| CCLasso      | 0.080 (0.009)        | 0.948 (0.008)        | 0.642 (0.048)        | 0.068 (0.005)        | 0.958 (0.008)        | 0.770 (0.051)        | 0.051 (0.004)        | 0.978 (0.003)        | 0.740 (0.044)        |
| SparCC       | 0.079 (0.004)        | 0.946 (0.007)        | 0.599 (0.044)        | 0.066 (0.004)        | 0.954 (0.009)        | 0.732 (0.049)        | 0.052 (0.002)        | 0.975 (0.003)        | 0.678 (0.043)        |
| REBACCA      | <b>0.069 (0.008)</b> | 0.949 (0.007)        | 0.652 (0.042)        | <b>0.060 (0.007)</b> | 0.960 (0.009)        | 0.767 (0.050)        | <b>0.037 (0.004)</b> | 0.978 (0.003)        | 0.724 (0.044)        |
| SPIEC (mb)   | -                    | 0.948 (0.007)        | 0.653 (0.043)        | -                    | 0.962 (0.011)        | 0.746 (0.046)        | -                    | 0.980 (0.003)        | 0.688 (0.039)        |
| SPIEC (gl)   | 0.072 (0.008)        | 0.948 (0.007)        | 0.679 (0.030)        | 0.073 (0.009)        | 0.957 (0.010)        | 0.746 (0.051)        | 0.038 (0.004)        | 0.979 (0.004)        | 0.745 (0.046)        |
| CCREPE       | 0.090 (0.007)        | 0.941 (0.006)        | 0.546 (0.031)        | 0.091 (0.007)        | 0.947 (0.009)        | 0.694 (0.045)        | 0.046 (0.003)        | 0.970 (0.003)        | 0.540 (0.030)        |
| Hub Graph    |                      |                      |                      |                      |                      |                      |                      |                      |                      |
| MPLasso      | <b>0.087 (0.001)</b> | <b>0.971 (0.003)</b> | <b>0.759 (0.027)</b> | 0.086 (0.001)        | <b>0.979 (0.003)</b> | <b>0.839 (0.032)</b> | 0.050 (0.001)        | <b>0.989 (0.001)</b> | <b>0.842 (0.027)</b> |
| CCLasso      | 0.107 (0.008)        | 0.964 (0.003)        | 0.619 (0.049)        | 0.096 (0.004)        | 0.972 (0.004)        | 0.783 (0.047)        | 0.072 (0.003)        | 0.986 (0.002)        | 0.811 (0.037)        |
| SparCC       | 0.107 (0.002)        | 0.963 (0.001)        | 0.573 (0.032)        | 0.098 (0.001)        | 0.966 (0.002)        | 0.674 (0.037)        | 0.070 (0.001)        | 0.984 (0.001)        | 0.725 (0.031)        |
| REBACCA      | 0.089 (0.002)        | 0.965 (0.003)        | 0.633 (0.047)        | <b>0.077 (0.004)</b> | 0.975 (0.005)        | 0.782 (0.060)        | <b>0.043 (0.002)</b> | <b>0.989 (0.002)</b> | <b>0.842 (0.042)</b> |
| SPIEC (mb)   | -                    | 0.961 (0.002)        | 0.649 (0.067)        | -                    | 0.965 (0.003)        | 0.666 (0.046)        | -                    | 0.984 (0.002)        | 0.669 (0.045)        |
| SPIEC (gl)   | 0.089 (0.000)        | 0.963 (0.001)        | 0.686 (0.018)        | 0.089 (0.000)        | 0.965 (0.003)        | 0.708 (0.027)        | 0.052 (0.000)        | 0.985 (0.001)        | 0.741 (0.023)        |
| CCREPE       | 0.093 (0.005)        | 0.962 (0.000)        | 0.524 (0.023)        | 0.094 (0.006)        | 0.962 (0.000)        | 0.611 (0.029)        | 0.058 (0.002)        | 0.981 (0.000)        | 0.555 (0.025)        |

We consider two additional graph structures (random and hub graph) and three sets of parameters, namely,  $(p = 50, n = 50)$ ,  $(p = 50, n = 100)$ , and  $(p = 100, n = 100)$ . For each experiment, we average over 100 simulation runs with standard deviations in round brackets. We use three metrics ( $L_1$ , ACC, AUPR) to quantify the performance. Bold number shows best result.
