# Supplementary material for: MPLasso: Inferring microbial association networks using prior microbial knowledge
Source: PubMed Central journal article supplement (PMC5760079; doi:10.1371/journal.pcbi.1005915), 2017-12-27
Supplement: pcbi.1005915.s013.pdf [file pcbi.1005915.s013.pdf]

**S3 Table. Performance comparison of different methods for additive log normal model.**

| Method           | $L_1$                | ACC                  | AUPR                 | $L_1$                | ACC                  | AUPR                 | $L_1$                | ACC                  | AUPR                 |
|------------------|----------------------|----------------------|----------------------|----------------------|----------------------|----------------------|----------------------|----------------------|----------------------|
| Random Graph     |                      |                      |                      |                      |                      |                      |                      |                      |                      |
| MPLasso          | 0.052 (0.007)        | <b>0.986 (0.005)</b> | <b>0.957 (0.021)</b> | 0.033 (0.004)        | <b>0.991 (0.002)</b> | <b>0.936 (0.024)</b> | <b>0.028 (0.003)</b> | <b>0.997 (0.001)</b> | <b>0.990 (0.006)</b> |
| CCLasso          | 0.053 (0.003)        | 0.967 (0.009)        | 0.854 (0.049)        | 0.044 (0.003)        | 0.984 (0.003)        | 0.866 (0.037)        | 0.035 (0.002)        | 0.989 (0.003)        | 0.929 (0.027)        |
| SparCC           | 0.059 (0.005)        | 0.962 (0.009)        | 0.821 (0.048)        | 0.042 (0.002)        | 0.983 (0.003)        | 0.838 (0.036)        | 0.036 (0.002)        | 0.988 (0.003)        | 0.913 (0.030)        |
| REBACCA          | <b>0.050 (0.007)</b> | 0.968 (0.009)        | 0.854 (0.047)        | <b>0.032 (0.004)</b> | 0.986 (0.003)        | 0.871 (0.035)        | 0.035 (0.001)        | 0.991 (0.003)        | 0.944 (0.027)        |
| SPIEC (mb)       | -                    | 0.977 (0.010)        | 0.847 (0.057)        | -                    | 0.989 (0.003)        | 0.845 (0.035)        | -                    | 0.996 (0.003)        | 0.939 (0.031)        |
| SPIEC (gl)       | 0.070 (0.011)        | 0.970 (0.013)        | 0.834 (0.073)        | 0.038 (0.005)        | 0.988 (0.003)        | 0.864 (0.042)        | 0.037 (0.004)        | 0.992 (0.003)        | 0.917 (0.044)        |
| CCREPE           | 0.091 (0.008)        | 0.962 (0.008)        | 0.811 (0.042)        | 0.045 (0.003)        | 0.974 (0.003)        | 0.718 (0.034)        | 0.045 (0.002)        | 0.983 (0.003)        | 0.848 (0.031)        |
| Hub Graph        |                      |                      |                      |                      |                      |                      |                      |                      |                      |
| MPLasso          | 0.083 (0.001)        | 0.988 (0.003)        | 0.936 (0.020)        | 0.047 (0.001)        | <b>0.995 (0.001)</b> | 0.959 (0.012)        | 0.044 (0.001)        | <b>0.999 (0.001)</b> | <b>0.997 (0.002)</b> |
| CCLasso          | 0.076 (0.004)        | 0.984 (0.005)        | 0.914 (0.036)        | 0.057 (0.002)        | 0.993 (0.001)        | 0.939 (0.018)        | 0.042 (0.001)        | 0.998 (0.001)        | 0.992 (0.005)        |
| SparCC           | 0.092 (0.001)        | 0.973 (0.003)        | 0.808 (0.034)        | 0.062 (0.001)        | 0.989 (0.001)        | 0.870 (0.021)        | 0.057 (0.000)        | 0.995 (0.001)        | 0.967 (0.010)        |
| REBACCA          | <b>0.061 (0.004)</b> | <b>0.989 (0.004)</b> | <b>0.946 (0.033)</b> | <b>0.030 (0.002)</b> | <b>0.995 (0.001)</b> | <b>0.966 (0.015)</b> | <b>0.017 (0.002)</b> | <b>0.999 (0.001)</b> | <b>0.997 (0.002)</b> |
| SPIEC (mb)       | -                    | 0.973 (0.006)        | 0.757 (0.048)        | -                    | 0.990 (0.002)        | 0.780 (0.050)        | -                    | 0.996 (0.001)        | 0.913 (0.033)        |
| SPIEC (gl)       | 0.088 (0.000)        | 0.972 (0.006)        | 0.768 (0.053)        | 0.052 (0.000)        | 0.989 (0.002)        | 0.825 (0.032)        | 0.052 (0.000)        | 0.995 (0.002)        | 0.919 (0.031)        |
| CCREPE           | 0.100 (0.004)        | 0.965 (0.003)        | 0.741 (0.038)        | 0.060 (0.002)        | 0.981 (0.000)        | 0.655 (0.033)        | 0.064 (0.002)        | 0.983 (0.001)        | 0.777 (0.032)        |
| Cluster Graph    |                      |                      |                      |                      |                      |                      |                      |                      |                      |
| MPLasso          | 0.042 (0.003)        | <b>0.946 (0.009)</b> | <b>0.841 (0.027)</b> | 0.024 (0.002)        | <b>0.969 (0.003)</b> | <b>0.798 (0.021)</b> | 0.020 (0.001)        | <b>0.979 (0.003)</b> | <b>0.895 (0.020)</b> |
| CCLasso          | 0.052 (0.002)        | 0.911 (0.010)        | 0.680 (0.029)        | 0.043 (0.002)        | 0.955 (0.004)        | 0.662 (0.030)        | 0.033 (0.001)        | 0.958 (0.004)        | 0.717 (0.024)        |
| SparCC           | 0.061 (0.003)        | 0.906 (0.010)        | 0.650 (0.024)        | 0.043 (0.002)        | 0.953 (0.003)        | 0.632 (0.024)        | 0.037 (0.002)        | 0.956 (0.004)        | 0.690 (0.022)        |
| REBACCA          | <b>0.031 (0.002)</b> | 0.911 (0.010)        | 0.679 (0.028)        | <b>0.018 (0.001)</b> | 0.956 (0.004)        | 0.667 (0.025)        | <b>0.014 (0.001)</b> | 0.958 (0.004)        | 0.718 (0.022)        |
| SPIEC (mb)       | -                    | 0.910 (0.013)        | 0.647 (0.035)        | -                    | 0.960 (0.006)        | 0.655 (0.030)        | -                    | 0.967 (0.006)        | 0.717 (0.035)        |
| SPIEC (gl)       | 0.061 (0.005)        | 0.908 (0.012)        | 0.658 (0.030)        | 0.029 (0.003)        | 0.956 (0.005)        | 0.661 (0.035)        | 0.029 (0.003)        | 0.961 (0.005)        | 0.711 (0.041)        |
| CCREPE           | 0.124 (0.009)        | 0.907 (0.009)        | 0.651 (0.022)        | 0.060 (0.005)        | 0.945 (0.003)        | 0.558 (0.023)        | 0.060 (0.005)        | 0.952 (0.004)        | 0.644 (0.021)        |
| Band(4) Graph    |                      |                      |                      |                      |                      |                      |                      |                      |                      |
| MPLasso          | 0.065 (0.006)        | <b>0.910 (0.005)</b> | <b>0.765 (0.015)</b> | 0.041 (0.001)        | <b>0.950 (0.002)</b> | <b>0.720 (0.013)</b> | 0.033 (0.001)        | 0.959 (0.002)        | 0.780 (0.010)        |
| CCLasso          | 0.056 (0.002)        | 0.876 (0.005)        | 0.625 (0.015)        | 0.049 (0.002)        | 0.937 (0.002)        | 0.606 (0.010)        | 0.037 (0.001)        | <b>0.944 (0.001)</b> | <b>0.669 (0.007)</b> |
| SparCC           | 0.070 (0.002)        | 0.869 (0.004)        | 0.595 (0.016)        | 0.049 (0.001)        | 0.935 (0.002)        | 0.578 (0.011)        | 0.043 (0.001)        | 0.941 (0.002)        | 0.645 (0.010)        |
| REBACCA          | <b>0.063 (0.002)</b> | 0.880 (0.005)        | 0.644 (0.017)        | <b>0.034 (0.001)</b> | 0.939 (0.002)        | 0.629 (0.012)        | <b>0.027 (0.001)</b> | 0.945 (0.002)        | 0.686 (0.009)        |
| SPIEC (mb)       | -                    | 0.862 (0.011)        | 0.650 (0.020)        | -                    | 0.940 (0.005)        | 0.630 (0.017)        | -                    | 0.945 (0.007)        | 0.682 (0.021)        |
| SPIEC (gl)       | 0.096 (0.000)        | 0.855 (0.010)        | 0.644 (0.015)        | 0.050 (0.000)        | 0.933 (0.003)        | 0.629 (0.014)        | 0.050 (0.000)        | 0.939 (0.003)        | 0.669 (0.015)        |
| CCREPE           | 0.175 (0.002)        | 0.871 (0.005)        | 0.593 (0.016)        | 0.090 (0.001)        | 0.924 (0.002)        | 0.495 (0.012)        | 0.091 (0.001)        | 0.935 (0.002)        | 0.582 (0.013)        |
| Scale-free Graph |                      |                      |                      |                      |                      |                      |                      |                      |                      |
| MPLasso          | 0.057 (0.008)        | <b>0.986 (0.004)</b> | <b>0.919 (0.035)</b> | 0.031 (0.004)        | <b>0.989 (0.002)</b> | <b>0.841 (0.035)</b> | 0.028 (0.004)        | <b>0.993 (0.002)</b> | <b>0.916 (0.037)</b> |
| CCLasso          | 0.057 (0.007)        | 0.976 (0.004)        | 0.836 (0.048)        | 0.042 (0.003)        | 0.986 (0.001)        | 0.755 (0.041)        | 0.034 (0.003)        | 0.987 (0.002)        | 0.815 (0.057)        |
| SparCC           | 0.058 (0.005)        | 0.974 (0.004)        | 0.807 (0.044)        | 0.040 (0.003)        | 0.985 (0.001)        | 0.724 (0.047)        | 0.034 (0.003)        | 0.987 (0.001)        | 0.801 (0.044)        |
| REBACCA          | <b>0.054 (0.009)</b> | 0.976 (0.004)        | 0.826 (0.050)        | <b>0.030 (0.005)</b> | 0.986 (0.001)        | 0.754 (0.044)        | <b>0.025 (0.005)</b> | 0.986 (0.002)        | 0.778 (0.064)        |
| SPIEC (mb)       | -                    | 0.981 (0.006)        | 0.818 (0.053)        | -                    | 0.987 (0.002)        | 0.740 (0.056)        | -                    | 0.990 (0.003)        | 0.818 (0.046)        |
| SPIEC (gl)       | 0.068 (0.008)        | 0.977 (0.005)        | 0.821 (0.049)        | 0.033 (0.004)        | 0.986 (0.002)        | 0.782 (0.035)        | 0.033 (0.005)        | 0.988 (0.002)        | 0.816 (0.035)        |
| CCREPE           | 0.072 (0.004)        | 0.970 (0.003)        | 0.794 (0.039)        | 0.034 (0.001)        | 0.980 (0.000)        | 0.628 (0.036)        | 0.035 (0.001)        | 0.983 (0.001)        | 0.740 (0.045)        |

We consider five different graph structures and three sets of parameters, namely,  $(p = 50, n = 200)$ ,  $(p = 100, n = 200)$ , and  $(p=100, n=400)$ . For each experiment, we average over 100 simulation runs with standard deviations in round brackets. Bold number shows best result.
