# Supplementary material for: MPLasso: Inferring microbial association networks using prior microbial knowledge
Source: PubMed Central journal article supplement (PMC5760079; doi:10.1371/journal.pcbi.1005915), 2017-12-27
Supplement: pcbi.1005915.s014.pdf [file pcbi.1005915.s014.pdf]

**S4 Table. Performance comparison of different methods on negative binomial model.**

| Method           | $L_1$                | ACC                  | AUPR                 | $L_1$                | ACC                  | AUPR                 | $L_1$                | ACC                  | AUPR                 |
|------------------|----------------------|----------------------|----------------------|----------------------|----------------------|----------------------|----------------------|----------------------|----------------------|
| Random Graph     |                      |                      |                      |                      |                      |                      |                      |                      |                      |
| MPLasso          | 0.071 (0.009)        | <b>0.956 (0.006)</b> | <b>0.737 (0.027)</b> | 0.064 (0.009)        | <b>0.971 (0.008)</b> | <b>0.855 (0.047)</b> | 0.052 (0.008)        | <b>0.987 (0.006)</b> | <b>0.957 (0.024)</b> |
| CCLasso          | 0.077 (0.008)        | 0.943 (0.007)        | 0.556 (0.037)        | 0.071 (0.004)        | 0.949 (0.007)        | 0.681 (0.052)        | 0.058 (0.004)        | 0.961 (0.009)        | 0.804 (0.051)        |
| SparCC           | 0.083 (0.004)        | 0.943 (0.007)        | 0.539 (0.032)        | 0.071 (0.004)        | 0.948 (0.008)        | 0.656 (0.050)        | 0.063 (0.006)        | 0.959 (0.010)        | 0.783 (0.051)        |
| REBACCA          | <b>0.070 (0.008)</b> | 0.949 (0.007)        | 0.658 (0.039)        | <b>0.061 (0.007)</b> | 0.959 (0.008)        | 0.761 (0.049)        | <b>0.050 (0.008)</b> | 0.969 (0.009)        | 0.858 (0.047)        |
| SPIEC (mb)       | -                    | 0.943 (0.007)        | 0.627 (0.035)        | -                    | 0.950 (0.008)        | 0.684 (0.034)        | -                    | 0.966 (0.013)        | 0.783 (0.056)        |
| SPIEC (gl)       | 0.074 (0.009)        | 0.943 (0.007)        | 0.654 (0.024)        | 0.074 (0.008)        | 0.950 (0.007)        | 0.700 (0.030)        | 0.072 (0.011)        | 0.960 (0.013)        | 0.768 (0.063)        |
| CCREPE           | 0.092 (0.005)        | 0.942 (0.007)        | 0.561 (0.036)        | 0.093 (0.007)        | 0.951 (0.007)        | 0.703 (0.047)        | 0.094 (0.008)        | 0.965 (0.009)        | 0.839 (0.046)        |
| Hub Graph        |                      |                      |                      |                      |                      |                      |                      |                      |                      |
| MPLasso          | <b>0.088 (0.001)</b> | <b>0.971 (0.003)</b> | <b>0.756 (0.027)</b> | 0.086 (0.001)        | <b>0.978 (0.003)</b> | <b>0.830 (0.035)</b> | 0.083 (0.001)        | 0.988 (0.003)        | 0.940 (0.019)        |
| CCLasso          | 0.102 (0.010)        | 0.963 (0.001)        | 0.537 (0.046)        | 0.100 (0.003)        | 0.963 (0.001)        | 0.603 (0.050)        | 0.085 (0.003)        | 0.968 (0.004)        | 0.753 (0.048)        |
| SparCC           | 0.112 (0.002)        | 0.963 (0.001)        | 0.514 (0.030)        | 0.101 (0.002)        | 0.963 (0.001)        | 0.577 (0.036)        | 0.057 (0.000)        | <b>0.995 (0.001)</b> | <b>0.967 (0.010)</b> |
| REBACCA          | 0.089 (0.002)        | 0.965 (0.003)        | 0.629 (0.047)        | <b>0.077 (0.004)</b> | 0.975 (0.006)        | 0.779 (0.077)        | <b>0.061 (0.004)</b> | 0.991 (0.004)        | 0.956 (0.029)        |
| SPIEC (mb)       | -                    | 0.961 (0.003)        | 0.650 (0.077)        | -                    | 0.962 (0.003)        | 0.643 (0.067)        | -                    | 0.968 (0.004)        | 0.708 (0.035)        |
| SPIEC (gl)       | 0.089 (0.000)        | 0.963 (0.001)        | 0.682 (0.027)        | 0.089 (0.000)        | 0.963 (0.001)        | 0.683 (0.022)        | 0.089 (0.000)        | 0.968 (0.004)        | 0.731 (0.034)        |
| CCREPE           | 0.094 (0.006)        | 0.963 (0.001)        | 0.518 (0.026)        | 0.096 (0.006)        | 0.963 (0.001)        | 0.613 (0.038)        | 0.103 (0.005)        | 0.969 (0.003)        | 0.758 (0.031)        |
| Cluster Graph    |                      |                      |                      |                      |                      |                      |                      |                      |                      |
| MPLasso          | 0.060 (0.005)        | <b>0.911 (0.011)</b> | <b>0.686 (0.029)</b> | 0.051 (0.003)        | <b>0.927 (0.010)</b> | <b>0.750 (0.029)</b> | 0.043 (0.003)        | <b>0.946 (0.009)</b> | <b>0.844 (0.028)</b> |
| CCLasso          | 0.080 (0.009)        | 0.890 (0.008)        | 0.476 (0.028)        | 0.071 (0.004)        | 0.896 (0.010)        | 0.560 (0.031)        | 0.059 (0.003)        | 0.905 (0.009)        | 0.642 (0.024)        |
| SparCC           | 0.088 (0.004)        | 0.890 (0.009)        | 0.466 (0.029)        | 0.074 (0.003)        | 0.895 (0.010)        | 0.544 (0.033)        | 0.066 (0.004)        | 0.903 (0.008)        | 0.623 (0.020)        |
| REBACCA          | <b>0.056 (0.004)</b> | 0.897 (0.010)        | 0.578 (0.029)        | <b>0.042 (0.003)</b> | 0.904 (0.009)        | 0.627 (0.027)        | <b>0.031 (0.002)</b> | 0.912 (0.009)        | 0.683 (0.025)        |
| SPIEC (mb)       | -                    | 0.891 (0.010)        | 0.589 (0.034)        | -                    | 0.896 (0.010)        | 0.607 (0.024)        | -                    | 0.902 (0.012)        | 0.640 (0.030)        |
| SPIEC (gl)       | 0.065 (0.006)        | 0.891 (0.009)        | 0.614 (0.021)        | 0.064 (0.005)        | 0.896 (0.009)        | 0.620 (0.019)        | 0.065 (0.006)        | 0.902 (0.011)        | 0.648 (0.024)        |
| CCREPE           | 0.125 (0.012)        | 0.889 (0.009)        | 0.483 (0.028)        | 0.127 (0.011)        | 0.898 (0.009)        | 0.583 (0.026)        | 0.130 (0.011)        | 0.911 (0.009)        | 0.673 (0.023)        |
| Band(4) Graph    |                      |                      |                      |                      |                      |                      |                      |                      |                      |
| MPLasso          | <b>0.093 (0.002)</b> | <b>0.870 (0.008)</b> | <b>0.656 (0.021)</b> | 0.087 (0.005)        | <b>0.886 (0.007)</b> | <b>0.692 (0.019)</b> | 0.067 (0.005)        | <b>0.909 (0.005)</b> | <b>0.762 (0.012)</b> |
| CCLasso          | 0.093 (0.006)        | 0.850 (0.002)        | 0.426 (0.037)        | 0.079 (0.003)        | 0.855 (0.004)        | 0.499 (0.020)        | 0.064 (0.003)        | 0.866 (0.006)        | 0.577 (0.019)        |
| SparCC           | 0.094 (0.003)        | 0.850 (0.002)        | 0.416 (0.023)        | 0.082 (0.002)        | 0.855 (0.003)        | 0.485 (0.021)        | 0.076 (0.002)        | 0.863 (0.005)        | 0.557 (0.019)        |
| REBACCA          | <b>0.093 (0.001)</b> | 0.854 (0.003)        | 0.523 (0.021)        | <b>0.079 (0.001)</b> | 0.864 (0.005)        | 0.572 (0.025)        | <b>0.063 (0.002)</b> | 0.880 (0.005)        | 0.643 (0.017)        |
| SPIEC (mb)       | -                    | 0.849 (0.002)        | 0.608 (0.040)        | -                    | 0.855 (0.005)        | 0.612 (0.024)        | -                    | 0.858 (0.007)        | 0.633 (0.021)        |
| SPIEC (gl)       | 0.096 (0.000)        | 0.849 (0.002)        | 0.619 (0.027)        | 0.096 (0.000)        | 0.855 (0.005)        | 0.623 (0.018)        | 0.096 (0.000)        | 0.855 (0.007)        | 0.638 (0.012)        |
| CCREPE           | 0.167 (0.004)        | 0.849 (0.001)        | 0.431 (0.021)        | 0.171 (0.004)        | 0.857 (0.004)        | 0.519 (0.020)        | 0.177 (0.003)        | 0.875 (0.006)        | 0.615 (0.018)        |
| Scale-free Graph |                      |                      |                      |                      |                      |                      |                      |                      |                      |
| MPLasso          | <b>0.067 (0.008)</b> | <b>0.970 (0.003)</b> | <b>0.751 (0.034)</b> | 0.065 (0.009)        | <b>0.976 (0.004)</b> | <b>0.818 (0.036)</b> | 0.057 (0.008)        | <b>0.985 (0.004)</b> | <b>0.915 (0.034)</b> |
| CCLasso          | 0.074 (0.009)        | 0.961 (0.001)        | 0.574 (0.053)        | 0.070 (0.007)        | 0.964 (0.002)        | 0.649 (0.049)        | 0.060 (0.007)        | 0.971 (0.004)        | 0.769 (0.047)        |
| SparCC           | 0.082 (0.006)        | 0.961 (0.001)        | 0.539 (0.039)        | 0.070 (0.006)        | 0.964 (0.002)        | 0.624 (0.044)        | 0.061 (0.005)        | 0.969 (0.004)        | 0.748 (0.052)        |
| REBACCA          | 0.070 (0.009)        | 0.966 (0.003)        | 0.662 (0.046)        | <b>0.063 (0.010)</b> | 0.972 (0.003)        | 0.749 (0.041)        | <b>0.054 (0.009)</b> | 0.977 (0.005)        | 0.826 (0.048)        |
| SPIEC (mb)       | -                    | 0.960 (0.002)        | 0.646 (0.055)        | -                    | 0.965 (0.003)        | 0.681 (0.047)        | -                    | 0.973 (0.005)        | 0.761 (0.041)        |
| SPIEC (gl)       | 0.069 (0.008)        | 0.962 (0.002)        | 0.678 (0.023)        | 0.069 (0.008)        | 0.966 (0.003)        | 0.718 (0.031)        | 0.068 (0.008)        | 0.972 (0.004)        | 0.775 (0.037)        |
| CCREPE           | 0.073 (0.004)        | 0.961 (0.001)        | 0.555 (0.040)        | 0.072 (0.004)        | 0.964 (0.002)        | 0.668 (0.047)        | 0.075 (0.004)        | 0.973 (0.004)        | 0.803 (0.045)        |

We consider five different graph structures and three sets of parameters, namely,  $(p = 50, n = 50)$ ,  $(p = 50, n = 100)$ , and  $(p = 50, n = 200)$ . For each experiment, we average over 100 simulation runs with standard deviations in round brackets. Bold number shows best result.
