# Supplementary material for: MPLasso: Inferring microbial association networks using prior microbial knowledge
Source: PubMed Central journal article supplement (PMC5760079; doi:10.1371/journal.pcbi.1005915), 2017-12-27
Supplement: pcbi.1005915.s015.pdf [file pcbi.1005915.s015.pdf]

**S5 Table. Performance comparison of different methods on negative binomial model.**

| Method           | $L_1$                | ACC                  | AUPR                 | $L_1$                | ACC                  | AUPR                 | $L_1$                | ACC                  | AUPR                 |
|------------------|----------------------|----------------------|----------------------|----------------------|----------------------|----------------------|----------------------|----------------------|----------------------|
| Random Graph     |                      |                      |                      |                      |                      |                      |                      |                      |                      |
| MPLasso          | <b>0.036 (0.004)</b> | <b>0.982 (0.003)</b> | <b>0.783 (0.033)</b> | 0.033 (0.003)        | <b>0.991 (0.003)</b> | <b>0.927 (0.028)</b> | 0.028 (0.003)        | <b>0.997 (0.001)</b> | <b>0.990 (0.008)</b> |
| CCLasso          | 0.048 (0.005)        | 0.973 (0.003)        | 0.609 (0.041)        | 0.045 (0.002)        | 0.979 (0.003)        | 0.777 (0.045)        | 0.036 (0.002)        | 0.986 (0.003)        | 0.893 (0.033)        |
| SparCC           | 0.054 (0.002)        | 0.973 (0.003)        | 0.580 (0.036)        | 0.045 (0.002)        | 0.978 (0.003)        | 0.753 (0.045)        | 0.038 (0.002)        | 0.986 (0.003)        | 0.881 (0.032)        |
| REBACCA          | <b>0.036 (0.004)</b> | 0.977 (0.003)        | 0.715 (0.038)        | <b>0.032 (0.003)</b> | 0.984 (0.004)        | 0.855 (0.045)        | <b>0.027 (0.003)</b> | 0.990 (0.003)        | 0.932 (0.028)        |
| SPIEC (mb)       | -                    | 0.974 (0.003)        | 0.620 (0.044)        | -                    | 0.984 (0.003)        | 0.766 (0.036)        | -                    | 0.990 (0.004)        | 0.866 (0.046)        |
| SPIEC (gl)       | 0.038 (0.005)        | 0.974 (0.003)        | 0.671 (0.023)        | 0.039 (0.004)        | 0.983 (0.003)        | 0.797 (0.041)        | 0.037 (0.004)        | 0.989 (0.004)        | 0.869 (0.050)        |
| CCREPE           | 0.048 (0.003)        | 0.972 (0.003)        | 0.600 (0.041)        | 0.048 (0.003)        | 0.980 (0.003)        | 0.791 (0.042)        | 0.047 (0.003)        | 0.988 (0.003)        | 0.911 (0.029)        |
| Hub Graph        |                      |                      |                      |                      |                      |                      |                      |                      |                      |
| MPLasso          | 0.050 (0.001)        | <b>0.990 (0.001)</b> | 0.846 (0.027)        | 0.047 (0.001)        | <b>0.995 (0.001)</b> | 0.958 (0.015)        | 0.044 (0.001)        | <b>0.999 (0.001)</b> | 0.996 (0.003)        |
| CCLasso          | 0.072 (0.003)        | 0.982 (0.001)        | 0.648 (0.038)        | 0.062 (0.002)        | 0.985 (0.002)        | 0.796 (0.041)        | 0.049 (0.001)        | 0.990 (0.002)        | 0.904 (0.030)        |
| SparCC           | 0.074 (0.001)        | 0.982 (0.000)        | 0.621 (0.029)        | 0.064 (0.001)        | 0.984 (0.001)        | 0.762 (0.031)        | 0.057 (0.000)        | 0.995 (0.001)        | 0.967 (0.010)        |
| REBACCA          | <b>0.043 (0.001)</b> | 0.989 (0.002)        | <b>0.847 (0.037)</b> | <b>0.031 (0.002)</b> | <b>0.995 (0.002)</b> | <b>0.966 (0.015)</b> | <b>0.017 (0.002)</b> | <b>0.999 (0.001)</b> | <b>0.997 (0.003)</b> |
| SPIEC (mb)       | -                    | 0.982 (0.001)        | 0.620 (0.049)        | -                    | 0.987 (0.002)        | 0.746 (0.039)        | -                    | 0.968 (0.004)        | 0.708 (0.035)        |
| SPIEC (gl)       | 0.052 (0.000)        | 0.983 (0.001)        | 0.701 (0.020)        | 0.052 (0.000)        | 0.987 (0.001)        | 0.779 (0.027)        | 0.089 (0.000)        | 0.968 (0.004)        | 0.731 (0.034)        |
| CCREPE           | 0.060 (0.003)        | 0.981 (0.000)        | 0.620 (0.030)        | 0.062 (0.002)        | 0.984 (0.001)        | 0.780 (0.031)        | 0.103 (0.005)        | 0.969 (0.003)        | 0.758 (0.031)        |
| Cluster Graph    |                      |                      |                      |                      |                      |                      |                      |                      |                      |
| MPLasso          | 0.029 (0.002)        | <b>0.959 (0.004)</b> | <b>0.694 (0.023)</b> | 0.024 (0.002)        | <b>0.970 (0.003)</b> | <b>0.802 (0.024)</b> | 0.020 (0.001)        | <b>0.979 (0.003)</b> | <b>0.891 (0.023)</b> |
| CCLasso          | 0.051 (0.004)        | 0.946 (0.003)        | 0.489 (0.025)        | 0.044 (0.003)        | 0.952 (0.003)        | 0.608 (0.029)        | 0.036 (0.001)        | 0.956 (0.004)        | 0.682 (0.025)        |
| SparCC           | 0.056 (0.002)        | 0.946 (0.003)        | 0.474 (0.024)        | 0.046 (0.002)        | 0.951 (0.003)        | 0.589 (0.028)        | 0.038 (0.002)        | 0.955 (0.004)        | 0.663 (0.026)        |
| REBACCA          | <b>0.025 (0.002)</b> | 0.950 (0.004)        | 0.582 (0.025)        | <b>0.019 (0.001)</b> | 0.956 (0.004)        | 0.674 (0.027)        | <b>0.014 (0.001)</b> | 0.959 (0.005)        | 0.719 (0.026)        |
| SPIEC (mb)       | -                    | 0.948 (0.003)        | 0.546 (0.034)        | -                    | 0.955 (0.004)        | 0.623 (0.026)        | -                    | 0.957 (0.004)        | 0.649 (0.028)        |
| SPIEC (gl)       | 0.031 (0.002)        | 0.948 (0.003)        | 0.584 (0.016)        | 0.031 (0.003)        | 0.954 (0.004)        | 0.641 (0.029)        | 0.030 (0.002)        | 0.955 (0.004)        | 0.650 (0.027)        |
| CCREPE           | 0.063 (0.005)        | 0.945 (0.003)        | 0.482 (0.024)        | 0.063 (0.005)        | 0.953 (0.003)        | 0.620 (0.028)        | 0.062 (0.005)        | 0.957 (0.004)        | 0.695 (0.026)        |
| Band(4) Graph    |                      |                      |                      |                      |                      |                      |                      |                      |                      |
| MPLasso          | 0.048 (0.001)        | <b>0.939 (0.003)</b> | <b>0.656 (0.015)</b> | 0.041 (0.001)        | <b>0.950 (0.001)</b> | <b>0.723 (0.011)</b> | 0.033 (0.001)        | <b>0.959 (0.001)</b> | <b>0.779 (0.009)</b> |
| CCLasso          | 0.059 (0.003)        | 0.925 (0.001)        | 0.435 (0.014)        | 0.052 (0.001)        | 0.932 (0.002)        | 0.543 (0.013)        | 0.041 (0.001)        | 0.939 (0.002)        | 0.626 (0.010)        |
| SparCC           | 0.062 (0.001)        | 0.925 (0.001)        | 0.419 (0.015)        | 0.052 (0.001)        | 0.931 (0.001)        | 0.523 (0.012)        | 0.046 (0.001)        | 0.938 (0.002)        | 0.611 (0.010)        |
| REBACCA          | <b>0.044 (0.001)</b> | 0.930 (0.002)        | 0.539 (0.015)        | <b>0.034 (0.001)</b> | 0.939 (0.001)        | 0.629 (0.011)        | <b>0.027 (0.001)</b> | 0.945 (0.002)        | 0.684 (0.009)        |
| SPIEC (mb)       | -                    | 0.926 (0.001)        | 0.556 (0.027)        | -                    | 0.930 (0.003)        | 0.602 (0.014)        | -                    | 0.934 (0.003)        | 0.644 (0.016)        |
| SPIEC (gl)       | 0.050 (0.000)        | 0.926 (0.001)        | 0.574 (0.017)        | 0.050 (0.000)        | 0.930 (0.002)        | 0.611 (0.013)        | 0.050 (0.000)        | 0.935 (0.003)        | 0.649 (0.014)        |
| CCREPE           | 0.091 (0.002)        | 0.923 (0.001)        | 0.428 (0.014)        | 0.093 (0.001)        | 0.933 (0.002)        | 0.554 (0.012)        | 0.095 (0.001)        | 0.942 (0.002)        | 0.643 (0.009)        |
| Scale-free Graph |                      |                      |                      |                      |                      |                      |                      |                      |                      |
| MPLasso          | <b>0.032 (0.005)</b> | <b>0.986 (0.001)</b> | <b>0.761 (0.024)</b> | 0.031 (0.004)        | <b>0.990 (0.002)</b> | <b>0.846 (0.038)</b> | 0.028 (0.005)        | <b>0.993 (0.002)</b> | <b>0.923 (0.036)</b> |
| CCLasso          | 0.042 (0.005)        | 0.981 (0.001)        | 0.565 (0.031)        | 0.041 (0.003)        | 0.984 (0.001)        | 0.696 (0.050)        | 0.036 (0.005)        | 0.985 (0.001)        | 0.771 (0.043)        |
| SparCC           | 0.052 (0.002)        | 0.981 (0.000)        | 0.543 (0.028)        | 0.042 (0.002)        | 0.983 (0.001)        | 0.667 (0.045)        | 0.036 (0.004)        | 0.985 (0.001)        | 0.757 (0.044)        |
| REBACCA          | 0.034 (0.005)        | 0.984 (0.001)        | 0.675 (0.027)        | <b>0.030 (0.005)</b> | 0.986 (0.002)        | 0.756 (0.051)        | <b>0.025 (0.006)</b> | 0.986 (0.002)        | 0.786 (0.055)        |
| SPIEC (mb)       | -                    | 0.981 (0.002)        | 0.625 (0.060)        | -                    | 0.985 (0.002)        | 0.707 (0.047)        | -                    | 0.987 (0.002)        | 0.772 (0.035)        |
| SPIEC (gl)       | 0.033 (0.005)        | 0.982 (0.001)        | 0.680 (0.025)        | 0.034 (0.005)        | 0.985 (0.002)        | 0.752 (0.034)        | 0.034 (0.005)        | 0.987 (0.002)        | 0.785 (0.034)        |
| CCREPE           | 0.038 (0.002)        | 0.981 (0.000)        | 0.563 (0.034)        | 0.037 (0.002)        | 0.983 (0.001)        | 0.703 (0.049)        | 0.037 (0.002)        | 0.986 (0.002)        | 0.802 (0.043)        |

We consider five different graph structures and three sets of parameters, namely,  $(p = 100, n = 100)$ ,  $(p = 100, n = 200)$ , and  $(p = 100, n = 400)$ . For each experiment, we average over 100 simulation runs with standard deviations in round brackets. Bold number shows best result.
