# Supplementary material for: MPLasso: Inferring microbial association networks using prior microbial knowledge
Source: PubMed Central journal article supplement (PMC5760079; doi:10.1371/journal.pcbi.1005915), 2017-12-27
Supplement: pcbi.1005915.s016.pdf [file pcbi.1005915.s016.pdf]

**S6 Table. Entry for the 2-by-2 contingency table with the number of abstracts containing neither taxon A nor B in HMP datasets.**

|       | AntNar  | BucMuc | Stool  | SupPla | TonDor |
|-------|---------|--------|--------|--------|--------|
| HMASM | 117312  | 54210  | 361101 | 234323 | 120543 |
| HMMCP | 672648  | 560200 | 812468 | 560171 | 562701 |
| HMQCP | 1297841 | 988084 | 722368 | 311344 | 438151 |

Abbreviations: AntNar: Anterior nares, BucMuc: Buccal mucosa, SupPla: Supragingival plaque, TonDor: Tongue dorsum.
