# Supplementary material for: MPLasso: Inferring microbial association networks using prior microbial knowledge
Source: PubMed Central journal article supplement (PMC5760079; doi:10.1371/journal.pcbi.1005915), 2017-12-27
Supplement: pcbi.1005915.s017.pdf [file pcbi.1005915.s017.pdf]

**S7 Table.** An illustration example of 2-by-2 contingency table that captures the information about how often two taxa appear together and separately.

|                  |              |
|------------------|--------------|
| $n_{i,j} = 2351$ | $n_j = 4750$ |
| $n_i = 349257$   | $M = 615268$ |

This example uses the taxa pair  $\langle i, j \rangle = \langle Escherichia, Citrobacter \rangle$ , where  $n_i$ : the number of abstracts that contains only taxon  $i$ ,  $n_j$ : the number of abstracts that contains only taxon  $j$ ,  $n_{i,j}$ : the number of abstracts that contain both taxa  $i$  and  $j$ , and  $M$ : the number of abstracts that contain neither taxa  $i$  and  $j$ . For this particular contingency table, Fisher's exact test rejects the hypothesis that taxa  $i$  and  $j$  are associated. Therefore, these two taxa are *not* associated with high statistical significance (i.e., the calculated  $p$ -value  $< 0.001$ ) and a higher penalty is placed between taxa  $i$  and  $j$  in the prior matrix.
