# Supplementary material for: MPLasso: Inferring microbial association networks using prior microbial knowledge
Source: PubMed Central journal article supplement (PMC5760079; doi:10.1371/journal.pcbi.1005915), 2017-12-27
Supplement: pcbi.1005915.s018.pdf [file pcbi.1005915.s018.pdf]

**S8 Table. Reproducibility for MPLasso, SPIEC (gl), and CCLasso at different body sites of different types of HMP datasets.**

| Body Site    | $(n, p)$   | MPLasso              | SPIEC (gl)    | CCLasso       |
|--------------|------------|----------------------|---------------|---------------|
| <b>HMASM</b> |            |                      |               |               |
| AntNar       | (91, 14)   | <b>0.917 (0.023)</b> | 0.679 (0.363) | 0.902 (0.022) |
| Stool        | (143, 87)  | <b>0.951 (0.005)</b> | 0.912 (0.019) | 0.914 (0.006) |
| <b>HMMCP</b> |            |                      |               |               |
| AntNar       | (445, 57)  | <b>0.901 (0.006)</b> | 0.734 (0.035) | 0.840 (0.013) |
| Stool        | (437, 135) | <b>0.956 (0.002)</b> | 0.908 (0.004) | 0.827 (0.009) |
| <b>HMQCP</b> |            |                      |               |               |
| AntNar       | (269, 116) | <b>0.937 (0.005)</b> | 0.899 (0.005) | 0.921 (0.004) |
| Stool        | (319, 64)  | <b>0.894 (0.005)</b> | 0.689 (0.030) | 0.806 (0.016) |

For each experiment, we average over 20 simulation runs with standard deviations in round brackets. Bold number shows best result.  $n$  and  $p$  represent sample size and taxa number, respectively. Abbreviations: AntNar: Anterior nares.
