# Supplementary material for: MPLasso: Inferring microbial association networks using prior microbial knowledge
Source: PubMed Central journal article supplement (PMC5760079; doi:10.1371/journal.pcbi.1005915), 2017-12-27
Supplement: pcbi.1005915.s019.pdf [file pcbi.1005915.s019.pdf]

**S9 Table. Different percentages of top degree nodes to calculate reproducibility for MPLasso, SPIEC (gl) and CCLasso at different body sites of different types of HMP datasets.**

| Body Site | MPLasso              | SPIEC (gl)    | CCLasso              | MPLasso              | SPIEC (gl)    | CCLasso              | MPLasso              | SPIEC (gl)    | CCLasso              |
|-----------|----------------------|---------------|----------------------|----------------------|---------------|----------------------|----------------------|---------------|----------------------|
| HMASM     | top 25%              |               |                      | top 50%              |               |                      | top 75%              |               |                      |
| AntNar    | 0.857 (0.057)        | 0.633 (0.423) | <b>0.891 (0.025)</b> | <b>0.885 (0.035)</b> | 0.661 (0.379) | 0.884 (0.021)        | 0.897 (0.030)        | 0.676 (0.363) | <b>0.901 (0.021)</b> |
| BucMuc    | <b>0.929 (0.008)</b> | 0.847 (0.019) | 0.703 (0.009)        | <b>0.942 (0.006)</b> | 0.859 (0.020) | 0.730 (0.006)        | <b>0.954 (0.004)</b> | 0.880 (0.016) | 0.732 (0.005)        |
| Stool     | <b>0.894 (0.011)</b> | 0.820 (0.032) | 0.917 (0.008)        | <b>0.919 (0.008)</b> | 0.857 (0.026) | 0.913 (0.007)        | <b>0.937 (0.006)</b> | 0.887 (0.022) | 0.914 (0.007)        |
| SupPla    | 0.887 (0.008)        | 0.794 (0.016) | <b>0.932 (0.005)</b> | <b>0.907 (0.007)</b> | 0.826 (0.012) | 0.927 (0.005)        | <b>0.925 (0.006)</b> | 0.852 (0.009) | 0.922 (0.005)        |
| TonDor    | 0.887 (0.010)        | 0.657 (0.029) | <b>0.928 (0.015)</b> | <b>0.916 (0.008)</b> | 0.692 (0.031) | 0.921 (0.014)        | <b>0.935 (0.006)</b> | 0.720 (0.031) | 0.918 (0.016)        |
| HMMCP     | top 25%              |               |                      | top 50%              |               |                      | top 75%              |               |                      |
| AntNar    | 0.855 (0.012)        | 0.689 (0.044) | <b>0.851 (0.017)</b> | <b>0.867 (0.010)</b> | 0.706 (0.039) | 0.840 (0.015)        | <b>0.880 (0.008)</b> | 0.716 (0.037) | 0.835 (0.013)        |
| BucMuc    | <b>0.884 (0.010)</b> | 0.722 (0.037) | 0.851 (0.018)        | <b>0.891 (0.008)</b> | 0.725 (0.036) | 0.834 (0.015)        | <b>0.905 (0.007)</b> | 0.740 (0.037) | 0.824 (0.014)        |
| Stool     | <b>0.911 (0.006)</b> | 0.852 (0.007) | 0.858 (0.011)        | <b>0.931 (0.003)</b> | 0.876 (0.006) | 0.840 (0.009)        | <b>0.944 (0.002)</b> | 0.892 (0.005) | 0.831 (0.010)        |
| SupPla    | <b>0.880 (0.008)</b> | 0.814 (0.014) | 0.866 (0.014)        | <b>0.891 (0.005)</b> | 0.829 (0.011) | 0.854 (0.013)        | <b>0.905 (0.005)</b> | 0.845 (0.009) | 0.845 (0.013)        |
| TonDor    | <b>0.890 (0.007)</b> | 0.786 (0.019) | 0.881 (0.011)        | <b>0.901 (0.004)</b> | 0.801 (0.017) | 0.872 (0.011)        | <b>0.917 (0.003)</b> | 0.807 (0.016) | 0.862 (0.012)        |
| HMQCP     | top 25%              |               |                      | top 50%              |               |                      | top 75%              |               |                      |
| AntNar    | 0.873 (0.011)        | 0.807 (0.009) | <b>0.909 (0.006)</b> | <b>0.905 (0.008)</b> | 0.851 (0.007) | 0.910 (0.006)        | <b>0.922 (0.007)</b> | 0.880 (0.006) | 0.917 (0.004)        |
| BucMuc    | 0.813 (0.018)        | 0.710 (0.033) | <b>0.860 (0.010)</b> | <b>0.825 (0.008)</b> | 0.733 (0.028) | 0.844 (0.011)        | <b>0.849 (0.007)</b> | 0.759 (0.026) | 0.829 (0.013)        |
| Stool     | <b>0.843 (0.009)</b> | 0.602 (0.049) | 0.842 (0.025)        | <b>0.858 (0.007)</b> | 0.622 (0.040) | 0.821 (0.022)        | <b>0.874 (0.006)</b> | 0.655 (0.035) | 0.804 (0.020)        |
| SupPla    | 0.844 (0.019)        | 0.754 (0.023) | <b>0.915 (0.007)</b> | 0.847 (0.017)        | 0.765 (0.019) | <b>0.896 (0.008)</b> | 0.860 (0.013)        | 0.787 (0.016) | <b>0.895 (0.007)</b> |
| TonDor    | 0.840 (0.015)        | 0.716 (0.029) | <b>0.863 (0.027)</b> | 0.846 (0.012)        | 0.729 (0.023) | <b>0.860 (0.022)</b> | <b>0.848 (0.011)</b> | 0.726 (0.022) | 0.847 (0.024)        |
| hickhline |                      |               |                      |                      |               |                      |                      |               |                      |

For each experiment, we average over 20 simulation runs with standard deviations in round brackets. Bold number shows best result. Abbreviations: AntNar: Anterior nares, BucMuc: Buccal mucosa, SupPla: Supragingival plaque, TonDor: Tongue dorsum.
