# Supplementary material for: MPLasso: Inferring microbial association networks using prior microbial knowledge
Source: PubMed Central journal article supplement (PMC5760079; doi:10.1371/journal.pcbi.1005915), 2017-12-27
Supplement: pcbi.1005915.s021.pdf [file pcbi.1005915.s021.pdf]

**S11 Table. Recovery rate of associated pairs found by CCLasso and SPIEC (gl).**

|              | Associated Pairs Found by CCLasso | Reproducible Associated Pairs (%) | Associated Pairs Found by SPIEC (gl) | Recovered Associated Pairs (%) |
|--------------|-----------------------------------|-----------------------------------|--------------------------------------|--------------------------------|
| <b>HMASM</b> |                                   |                                   |                                      |                                |
| AntNar       | 26                                | 21 (80%)                          | 65                                   | 60 (92%)                       |
| BucMuc       | 984                               | 868 (88%)                         | 239                                  | 152 (63%)                      |
| Stool        | 1425                              | 1252 (87%)                        | 165                                  | 126 (76%)                      |
| SupPla       | 4496                              | 4161 (92%)                        | 1009                                 | 691 (68%)                      |
| TonDor       | 3005                              | 2816 (93%)                        | 1130                                 | 721 (63%)                      |
| <b>HMMCP</b> |                                   |                                   |                                      |                                |
| AntNar       | 584                               | 464 (79%)                         | 696                                  | 530 (76%)                      |
| BucMuc       | 1293                              | 1089 (84%)                        | 1049                                 | 751 (71%)                      |
| Stool        | 4047                              | 3119 (77%)                        | 1213                                 | 879 (72%)                      |
| SupPla       | 1735                              | 1459 (84%)                        | 916                                  | 682 (74%)                      |
| TonDor       | 1735                              | 1494 (86%)                        | 1005                                 | 751 (74%)                      |
| <b>HMQCP</b> |                                   |                                   |                                      |                                |
| AntNar       | 1733                              | 953 (54%)                         | 991                                  | 656 (66%)                      |
| BucMuc       | 1551                              | 1259 (81%)                        | 1116                                 | 814 (72%)                      |
| Stool        | 967                               | 769 (79%)                         | 860                                  | 635 (73%)                      |
| SupPla       | 752                               | 656 (87%)                         | 589                                  | 447 (75%)                      |
| TonDor       | 615                               | 540 (87%)                         | 589                                  | 474 (80%)                      |

The first and third column is the number of pairs found by CCLasso and SPIEC (gl) using full dataset. The second and fourth column is the recovered associated pairs; we use half of the full dataset to calculate the recovery rate.
