# Supplementary material for: MPLasso: Inferring microbial association networks using prior microbial knowledge
Source: PubMed Central journal article supplement (PMC5760079; doi:10.1371/journal.pcbi.1005915), 2017-12-27
Supplement: pcbi.1005915.s022.pdf [file pcbi.1005915.s022.pdf]

**S12 Table. Interacting taxa pairs found by automated text-mining methods and association pairs suggested by MPLasso.**

| Taxa Pairs                                                       | Body Sites | Type | Reference |
|------------------------------------------------------------------|------------|------|-----------|
| <i>Fusobacterium nucleatum</i> , <i>Treponema denticola</i>      | SupPla     | NEG  | [1]       |
| <i>Prevotella intermedia</i> , <i>Streptococcus mitis</i>        | SupPla     | NEG  | [2]       |
| <i>Fusobacterium periodonticum</i> , <i>Treponema vincentii</i>  | SupPla     | NEG  | [1]       |
| <i>Streptococcus australis</i> , <i>Catonella morbi</i>          | SupPla     | NA   | MPLasso   |
| <i>Leptotrichia shahii</i> , <i>Leptotrichia wadei</i>           | SupPla     | NA   | MPLasso   |
| <i>Streptococcus sanguinis</i> , <i>Fusobacterium nucleatum</i>  | BucMuc     | NEG  | [3]       |
| <i>Actinomyces naeslundii</i> , <i>Fusobacterium nucleatum</i>   | BucMuc     | NEG  | [4]       |
| <i>Streptococcus infantis</i> , <i>Streptococcus salivarius</i>  | BucMuc     | NEG  | [5]       |
| <i>Actinomyces graevenitzi</i> , <i>Actinomyces naeslundii</i>   | BucMuc     | NA   | MPLasso   |
| <i>Rothia aerea</i> , <i>Rothia dentocariosa</i>                 | BucMuc     | NA   | MPLasso   |
| <i>Actinomyces oris</i> , <i>Fusobacterium nucleatum</i>         | TonDor     | NEG  | [6]       |
| <i>Prevotella nigrescens</i> , <i>Prevotella pallens</i>         | TonDor     | NEG  | [7]       |
| <i>Fusobacterium periodonticum</i> , <i>Treponema socranskii</i> | TonDor     | NEG  | [1]       |
| <i>Neisseria meningitidis</i> , <i>Treponema vincentii</i>       | TonDor     | NA   | MPLasso   |
| <i>Leptotrichia buccalis</i> , <i>Neisseria meningitidis</i>     | TonDor     | NA   | MPLasso   |

NEG means negative interactions. NA means Not Applicable since MPLasso is not able to differentiate the interaction type.

## References

1. Kolenbrander PE, et al. Intergeneric coaggregation of oral *Treponema* spp. with *Fusobacterium* spp. and intrageneric coaggregation among *Fusobacterium* spp. *Infection and Immunity*. 1995;63(12):4584–8.
2. Van Hoogmoed CG, et al. Reduction of periodontal pathogens adhesion by antagonistic strains. *Oral Microbiology and Immunology*. 2008;23(1):43–48. doi:10.1111/j.1399-302X.2007.00388.x.
3. Jiang Q, et al. Interactions between *Lactobacillus rhamnosus* GG and oral micro-organisms in an in vitro biofilm model. *BMC Microbiology*. 2016;16(1):149. doi:10.1186/s12866-016-0759-7.
4. Periasamy S, et al. *Fusobacterium nucleatum* ATCC 10953 requires *Actinomyces naeslundii* ATCC 43146 for growth on saliva in a three-species community that includes *Streptococcus oralis* 34. *Applied and Environmental Microbiology*. 2009;75(10):3250–3257. doi:10.1128/AEM.02901-08.
5. Ortiz-Lucas M, et al. Effect of probiotic species on irritable bowel syndrome symptoms: A bring up to date meta-analysis. *Revista Espanola de Enfermedades Digestivas*. 2013;105(1):19–36.
6. Periasamy S, Kolenbrander PE. Central Role of the Early Colonizer *Veillonella* sp. in Establishing Multispecies Biofilm Communities with Initial, Middle, and Late Colonizers of Enamel. *Journal of Bacteriology*. 2010;192(12):2965–2972. doi:10.1128/JB.01631-09.
7. Gursoy UK, et al. *Prevotella intermedia* ATCC 25611 targets host cell lamellipodia in epithelial cell adhesion and invasion. *Oral Microbiology and Immunology*. 2009;24(4):304–309. doi:10.1111/j.1399-302X.2009.00510.x.
