# Supplementary material for: MPLasso: Inferring microbial association networks using prior microbial knowledge
Source: PubMed Central journal article supplement (PMC5760079; doi:10.1371/journal.pcbi.1005915), 2017-12-27
Supplement: pcbi.1005915.s023.pdf [file pcbi.1005915.s023.pdf]

**S13 Table. Accuracy of edge sign recovery accuracy for different algorithms on different synthetic graph structures.**

|                    | MPLasso | CCLasso | REBACCA | SparCC | SPIEC (mb) | SPIEC (gl) | CCREPE |
|--------------------|---------|---------|---------|--------|------------|------------|--------|
| $n = 50, p = 50$   |         |         |         |        |            |            |        |
| Random             | 1.00    | 0.99    | 1.00    | 0.99   | 0.82       | 1.00       | 1.00   |
| Cluster            | 1.00    | 0.90    | 1.00    | 0.90   | 0.72       | 1.00       | 1.00   |
| Hub                | 1.00    | 0.99    | 1.00    | 0.99   | 0.89       | 1.00       | 1.00   |
| Scale-free         | 1.00    | 0.98    | 1.00    | 0.94   | 0.96       | 1.00       | 1.00   |
| Band(4)            | 1.00    | 0.90    | 1.00    | 0.87   | 0.82       | 1.00       | 1.00   |
| $n = 100, p = 50$  |         |         |         |        |            |            |        |
| Random             | 1.00    | 1.00    | 1.00    | 1.00   | 0.94       | 1.00       | 1.00   |
| Cluster            | 1.00    | 0.93    | 1.00    | 0.91   | 0.91       | 1.00       | 1.00   |
| Hub                | 1.00    | 1.00    | 1.00    | 1.00   | 0.95       | 1.00       | 1.00   |
| Scale-free         | 1.00    | 0.99    | 1.00    | 1.00   | 0.95       | 1.00       | 1.00   |
| Band(4)            | 1.00    | 0.90    | 1.00    | 0.90   | 0.83       | 1.00       | 1.00   |
| $n = 100, p = 100$ |         |         |         |        |            |            |        |
| Random             | 1.00    | 1.00    | 1.00    | 1.00   | 0.96       | 1.00       | 1.00   |
| Cluster            | 1.00    | 0.98    | 1.00    | 0.94   | 0.97       | 1.00       | 1.00   |
| Hub                | 1.00    | 1.00    | 1.00    | 1.00   | 0.99       | 1.00       | 1.00   |
| Scale-free         | 1.00    | 1.00    | 1.00    | 0.99   | 0.90       | 1.00       | 1.00   |
| Band(4)            | 1.00    | 0.90    | 1.00    | 0.90   | 0.83       | 1.00       | 1.00   |
| $n = 200, p = 200$ |         |         |         |        |            |            |        |
| Random             | 1.00    | 1.00    | 1.00    | 1.00   | 1.00       | 1.00       | 1.00   |
| Cluster            | 1.00    | 1.00    | 1.00    | 0.99   | 1.00       | 1.00       | 1.00   |
| Hub                | 1.00    | 1.00    | 1.00    | 1.00   | 1.00       | 1.00       | 1.00   |
| Scale-free         | 1.00    | 1.00    | 1.00    | 1.00   | 0.94       | 1.00       | 1.00   |
| Band(4)            | 1.00    | 0.95    | 1.00    | 0.90   | 1.00       | 1.00       | 1.00   |

$n$  and  $p$  represent number of samples and number of taxa, respectively.
