# Supplementary material for: MPLasso: Inferring microbial association networks using prior microbial knowledge
Source: PLoS Comput Biol. 2017 Dec 27;13(12):e1005915. doi: 10.1371/journal.pcbi.1005915 (PMC5760079; doi:10.1371/journal.pcbi.1005915)
Supplement: S10 Table — (PDF) [file pcbi.1005915.s020.pdf]

**S10 Table. Prior Information and the recovery rate of associated pairs found by MPLasso.**

|              | Non-associated Pairs (Prior Information) | Potentially Associated Pairs | Associated Pairs Found by MPLasso | Recovered Associated Pairs (%) |
|--------------|------------------------------------------|------------------------------|-----------------------------------|--------------------------------|
| <b>HMASM</b> |                                          |                              |                                   |                                |
| AntNar       | 51                                       | 36                           | 24                                | 21 (88%)                       |
| BucMuc       | 2137                                     | 491                          | 209                               | 164 (78%)                      |
| Stool        | 3033                                     | 708                          | 341                               | 232 (68%)                      |
| SupPla       | 6291                                     | 1965                         | 976                               | 663 (68%)                      |
| TonDor       | 4083                                     | 1170                         | 635                               | 514 (80%)                      |
| <b>HMMCP</b> |                                          |                              |                                   |                                |
| AntNar       | 869                                      | 727                          | 452                               | 373 (83%)                      |
| BucMuc       | 1692                                     | 936                          | 511                               | 427 (84%)                      |
| Stool        | 6012                                     | 2084                         | 721                               | 603 (84%)                      |
| SupPla       | 6291                                     | 1195                         | 672                               | 529 (78%)                      |
| TonDor       | 2006                                     | 920                          | 658                               | 580 (88%)                      |
| <b>HMQCP</b> |                                          |                              |                                   |                                |
| AntNar       | 4213                                     | 2457                         | 768                               | 538 (70%)                      |
| BucMuc       | 1504                                     | 1271                         | 819                               | 662 (80%)                      |
| Stool        | 1144                                     | 872                          | 620                               | 525 (85%)                      |
| SupPla       | 601                                      | 674                          | 420                               | 340 (81%)                      |
| TonDor       | 365                                      | 625                          | 469                               | 413 (88%)                      |

The first column corresponds to the prior information obtained from the microbial co-occurrence method. The second column is the estimation of the number of potentially associated pairs. The third column is the number of associated pairs found by MPLasso using full dataset. The forth column is the number of recovered associated pairs; we use half of the full dataset to calculate the recovery rate.
